# Supplementary material
Source: PubMed Central journal article supplement (PMC6742922)
Supplement: bloodBLD2019000611-suppl1.pdf [file bloodBLD2019000611-suppl1.pdf]

## Supplementary Information

### Supplementary Materials and Methods

#### Patient sample processing

Samples were sent to the coordinating center (OHSU; IRB 4422; NCT01728402), where they were coded and processed. Specific names of centers associated with each specimen were coded (code 1-14) and centers providing less than two samples were aggregated together and given one center identifier (code 15). Mononuclear cells were isolated by Ficoll gradient centrifugation and/or red cell lysis from freshly obtained bone marrow aspirates or peripheral blood draws. Cell pellets were snap-frozen in liquid nitrogen for subsequent DNA isolation (Qiagen, DNeasy Blood & Tissue Kit), freshly pelleted cells were lysed immediately in guanidinium thiocyanate (GTC) lysate for subsequent RNA isolation (Qiagen, RNeasy Mini Kit). All samples were collected between 2001-2015.

Clinical, prognostic, genetic, cytogenetic and pathologic laboratory values, as well as treatment and outcome data, were manually curated from the electronic medical records of the patient. Patients were assigned a specific diagnosis in accordance with WHO 2017 criteria. Cases fulfilling 2017 WHO classification criteria for RARS-T, MDS or MPN were excluded. Cases with *BCR/ABL1*, *PDGFRA*, *PDGFRB*, or *FGFR1* rearrangement were also excluded. Totally, we have collected clinical information of 41 CNL, 28 aCML, 14 MDS/MPN-U, 13 MPN-U, 30 CMML and 57 patients with NA or ambiguous diagnosis. Notably, alternative diagnosis indicates cases with transformed AML, mastocytosis, reactive neutrophilia or MPN diagnosis, which are therefore excluded from the analysis.

#### WES processing

Initial data processing and alignments were performed with in-house workflows. BWA MEM<sup>1</sup> was used to align the read pairs for each sample-lane FASTQ file. As part of this process, the flowcell and lane information was kept as part of the read group of the resulting SAM file. The Genome Analysis Toolkit (v3.3)<sup>2</sup> and the bundled Picard were used for alignment post-processing. The files contained within the Broad's bundle 2.8 were used including their version of the build 37 human genome (These files were downloaded from: <ftp://ftp.broadinstitute.org/bundle/2.8/b37/>). The following steps were performed per sample-lane SAM file generated for each CaptureGroup:

1. The SAM files were sorted and converted to BAM via SortSam
2. MarkDuplicates was run, marking both lane level standard and optical duplicates

3. The reads were realigned around indels from the reads  
RealignerTargetCreator/IndelRealigner.

#### 4. Base Quality Score Recalibration

The resulting BAM files were then aggregated by the sample and an additional round of MarkDuplicates. Indel realignment was carried out again across the cohort of samples. Genotyping was performed using the UnifiedGenotyper tool that is part of GATK. These variants were assigned to their most deleterious effect on Ensembl transcripts using Ensembl VEP v83 on GRCh37 and further curated. CALR indels were called from Pindel<sup>3</sup>.

### **Variant Calling**

Variant calling was similar to a previous study<sup>4</sup>. Briefly, since no paired normal tissue controls were available, we compiled a list of genes associated with human hematologic malignancies according to these two papers<sup>5,6</sup>. In total, 170 genes were selected (Supplementary Table 1). The following filters were used: 1) excluding variants at a frequency greater than 0.1% in the ExAC database, and excluding variants at a frequency greater than 20% in BeatAML normal controls<sup>7</sup>; 2) including variant types: Missense; Frameshift; Stop gain/loss; Inframe insertion/deletion; Protein altering; and Tandem duplication for 132 genes listed in Supplementary table 1 (regular black font). 4) In addition, only frameshift, stop gain/loss and Inframe insertion/deletion variants are considered for the 38 genes in bold red font in Supplementary Table 1. 5) Variants were further manually curated, excluding variants seen in dbSNP, but not in Cosmic; predicted 'tolerated' by sift and predicted 'benign' by polyphen; some TCGA and Jaiswal variants were added back based on convincing VAF pattern and known pathogenic role. 6) For the final list, only variants in genes highly relevant to hematology malignancies from the knowledge of AML literature were included, and only inframe indels of *CALR* were included.

### **Sanger sequencing**

Sanger sequencing was performed as previously described<sup>8</sup>. *ASXL1* exons were amplified using forward primer 5'-GCAATTTAGGTATGAAAGCCAGC-3' and reverse primer 5'-CTTTCAGCATTTTGACGGCAACC-3'. PCR products were purified using Amicon Ultra Centrifugal Filters (#UFC503096, Millipore) and sequenced with the same primers by Eurofins operons.

### **RNAseq Expression processing**

The Subjunc aligner<sup>9</sup> was used to align reads to the GRCh37 version of the human genome. These alignments were summarized at the gene-level relative to Ensembl 83 gene models using featureCounts<sup>9</sup>. RNA genotyping was performed using the same protocol as the WES.

### **Copy number variations**

Copy number variations were called using CNVkit<sup>10</sup>. Two reference normalization approaches were carried out depending on the library used. For samples run using the Nimblegen library, we utilized three available skin controls from another project. For samples run using the Nextera library prep, we utilized 50 normal samples from the BeatAML project<sup>7</sup>. Segmentation was performed using DNACopy<sup>11</sup> and the segmented data was summarized per sample and region using CNTools (<http://bioconductor.org/packages/release/bioc/html/CNTools.html>).

### **Fusions**

Fusions have been generated using STAR-Fusion v1.3.2<sup>12</sup> and Tophat v2.0.14<sup>13</sup>. As fusion calling is necessarily based on the gene models and other annotations utilized (and provided) by a given fusion detection method, we first annotated all the Tophat-fusion calls relative to the STAR-fusion resource gene models to facilitate comparison<sup>12</sup>. We then summarized the fusions treating the left and right genes interchangeably (i.e. *BCR-ABL1* and *ABL1-BCR* would be considered the same fusion) and compared the fusion calls between the callers. High relevant fusion is defined by fusions that are detected by both algorithms, not seen in normal controls and with a fusion allele frequency (FAF) higher than 10%. For the final variant list, only two known pathogenic fusions (*FLT3-MYO18A* and *ABL1-ETV6*) were included<sup>14</sup>.

### **Clustering of the patient samples**

We used the Consensus Clustering approach<sup>15</sup> which provides robust clusters based on the expression data by repeatedly clustering random subsets (genes and sample) of the data and recording whether samples cluster together at each repetition for a given number of clusters (k). For this analysis, we used the 80 patient samples and the top 2,000 most variable genes. We clustered them using hierarchical clustering based on the magnitude of their expression levels (Euclidean distance) repeating the procedure 10,000 times. We chose k=7 due to consideration of the cluster definitions as well as comparison with simulated null distributions. We do note, however, that none of the k clusters was strongly defined or performed substantially better than the others.

**Supplementary Table 1. List of queried hematopoietic genes.**

|                        |                       |                     |                     |                       |                       |                     |                      |                      |                      |
|------------------------|-----------------------|---------------------|---------------------|-----------------------|-----------------------|---------------------|----------------------|----------------------|----------------------|
| <i>ABL1</i>            | <i>ARID1A</i>         | <b><i>ASXL1</i></b> | <b><i>ASXL2</i></b> | <i>BCL10</i>          | <i>BCL11B</i>         | <i>BCL6</i>         | <b><i>BCOR</i></b>   | <b><i>BCORL1</i></b> | <b><i>BIRC3</i></b>  |
| <i>BRAF</i>            | <b><i>BRCC3</i></b>   | <i>BTG1</i>         | <i>BTG2</i>         | <i>CARD11</i>         | <i>CBFB</i>           | <i>CBL</i>          | <i>CBLB</i>          | <i>CCND2</i>         | <i>CCND3</i>         |
| <i>CD58</i>            | <i>CD70</i>           | <i>CD79A</i>        | <i>CD79B</i>        | <i>CDKN2A</i>         | <i>CDKN2B</i>         | <i>CEBPA</i>        | <i>CHD2</i>          | <i>CNOT3</i>         | <i>CREBBP</i>        |
| <i>CRLF2</i>           | <i>CSF1R</i>          | <i>CSF3R</i>        | <i>CTCF</i>         | <b><i>CUX1</i></b>    | <i>DDX3X</i>          | <i>DIS3</i>         | <i>DNMT3A</i>        | <i>EBF1</i>          | <i>EED</i>           |
| <i>EP300</i>           | <i>ETNK1</i>          | <i>ETV6</i>         | <i>EZH2</i>         | <i>EZR</i>            | <b><i>FAM46C</i></b>  | <b><i>FAS</i></b>   | <b><i>FBXO11</i></b> | <i>FBXW7</i>         | <i>FLT3</i>          |
| <b><i>FOXP1</i></b>    | <i>FYN</i>            | <i>GATA1</i>        | <i>GATA2</i>        | <i>GATA3</i>          | <i>GNA13</i>          | <i>GNAS</i>         | <i>GNB1</i>          | <i>HIST1H1B</i>      | <i>HIST1H1C</i>      |
| <b><i>HIST1H1D</i></b> | <i>HIST1H1E</i>       | <i>HIST1H3B</i>     | <i>HLA-A</i>        | <i>ID3</i>            | <i>IDH1</i>           | <i>IDH2</i>         | <i>IKBKB</i>         | <b><i>IKZF1</i></b>  | <b><i>IKZF2</i></b>  |
| <b><i>IKZF3</i></b>    | <i>IL7R</i>           | <i>INTS12</i>       | <i>IRF4</i>         | <i>IRF8</i>           | <i>JAK1</i>           | <i>JAK2</i>         | <i>JAK3</i>          | <b><i>JARID2</i></b> | <b><i>KDM6A</i></b>  |
| <i>KIT</i>             | <i>KLHL6</i>          | <b><i>KMT2A</i></b> | <b><i>KMT2C</i></b> | <b><i>KMT2D</i></b>   | <i>KRAS</i>           | <b><i>LEF1</i></b>  | <i>LRRK2</i>         | <b><i>LTB</i></b>    | <b><i>LUC7L2</i></b> |
| <i>MALT1</i>           | <i>MAP2K1</i>         | <i>MAP3K14</i>      | <i>MED12</i>        | <i>MEF2B</i>          | <i>MPL</i>            | <i>MXRA5</i>        | <i>MYD88</i>         | <i>NF1</i>           | <b><i>NFE2</i></b>   |
| <b><i>NOTCH1</i></b>   | <b><i>NOTCH2</i></b>  | <i>NPM1</i>         | <i>NRAS</i>         | <i>NTRK2</i>          | <i>NTRK3</i>          | <i>P2RY8</i>        | <b><i>PAPD5</i></b>  | <b><i>PAX5</i></b>   | <b><i>PDS5B</i></b>  |
| <b><i>PDSS2</i></b>    | <i>PHF6</i>           | <i>PIK3CA</i>       | <b><i>POT1</i></b>  | <i>POU2AF1</i>        | <i>POU2F2</i>         | <b><i>PPM1D</i></b> | <i>PRDM1</i>         | <i>PRPF40B</i>       | <i>PRPF8</i>         |
| <i>PTEN</i>            | <i>PTPN1</i>          | <i>PTPN11</i>       | <b><i>RAD21</i></b> | <b><i>RAD21L1</i></b> | <i>RBBP4</i>          | <i>RHOA</i>         | <i>RIT1</i>          | <i>RPL10</i>         | <b><i>RPL5</i></b>   |
| <i>RPS15</i>           | <i>RPS2</i>           | <i>RUNX1</i>        | <i>SETBP1</i>       | <i>SF3A1</i>          | <i>SF3B1</i>          | <b><i>SGK1</i></b>  | <b><i>SH2B3</i></b>  | <i>SMC1A</i>         | <i>SMC3</i>          |
| <b><i>SOCS1</i></b>    | <i>SPRY4</i>          | <i>SRSF2</i>        | <b><i>STAG1</i></b> | <b><i>STAG2</i></b>   | <i>STAT3</i>          | <i>STAT5A</i>       | <i>STAT5B</i>        | <i>STAT6</i>         | <b><i>SUZ12</i></b>  |
| <b><i>SWAP70</i></b>   | <b><i>TBL1XR1</i></b> | <i>TCF3</i>         | <b><i>TET1</i></b>  | <i>TET2</i>           | <b><i>TMEM30A</i></b> | <i>TNF</i>          | <i>TNFAIP3</i>       | <i>TNFRSF14</i>      | <i>TP53</i>          |
| <b><i>TRAF3</i></b>    | <i>TYW1</i>           | <i>U2AF1</i>        | <i>U2AF2</i>        | <b><i>UBR5</i></b>    | <i>WT1</i>            | <i>XBP1</i>         | <i>XPO1</i>          | <i>ZNF471</i>        | <b><i>ZRSR2</i></b>  |

Gene with red bold font indicates that only frameshift, stop gain/loss and inframe insertion/deletion variants are considered for these genes.

**Supplementary Table 2. The frequency of gene mutations in different diagnosis groups**

|                    | CNL           | aCML  | Unclassifiable | CMML  | CNL    | aCML | Unclassifiable | CMML |
|--------------------|---------------|-------|----------------|-------|--------|------|----------------|------|
|                    | Frequency (%) |       |                |       | Number |      |                |      |
| <i>CSF3R</i>       | 64.1%         | 22.2% | 4.0%           | 3.4%  | 25     | 6    | 1              | 1    |
| <i>NRAS</i>        | 10.3%         | 25.9% | 8.0%           | 37.9% | 18     | 7    | 2              | 11   |
| <i>JAK2</i>        | 7.7%          | 11.1% | 8.0%           | 3.4%  | 3      | 3    | 2              | 1    |
| <i>CBL</i>         | 5.1%          | 11.1% | 8.0%           | 17.2% | 2      | 3    | 2              | 5    |
| <i>CBLB</i>        | 0.0%          | 0.0%  | 0.0%           | 0.0%  | 0      | 0    | 0              | 0    |
| <i>PTPN11</i>      | 10.3%         | 0.0%  | 4.0%           | 3.4%  | 4      | 0    | 1              | 1    |
| <i>KRAS</i>        | 0.0%          | 3.7%  | 4.0%           | 10.3% | 0      | 1    | 1              | 3    |
| <i>NF1</i>         | 0.0%          | 0.0%  | 4.0%           | 3.4%  | 0      | 0    | 1              | 1    |
| <i>FLT3</i>        | 0.0%          | 7.4%  | 4.0%           | 0.0%  | 0      | 2    | 1              | 0    |
| <i>STAT5B</i>      | 0.0%          | 3.7%  | 4.0%           | 0.0%  | 0      | 1    | 1              | 0    |
| <i>ABL1</i>        | 5.1%          | 3.7%  | 0.0%           | 0.0%  | 2      | 1    | 0              | 0    |
| <i>GNB1</i>        | 2.6%          | 3.7%  | 0.0%           | 0.0%  | 1      | 1    | 0              | 0    |
| <i>SH2B3</i>       | 0.0%          | 3.7%  | 0.0%           | 0.0%  | 0      | 1    | 0              | 0    |
| <i>JAK1</i>        | 0.0%          | 0.0%  | 4.0%           | 3.4%  | 0      | 0    | 1              | 1    |
| <i>KIT</i>         | 0.0%          | 0.0%  | 4.0%           | 0.0%  | 0      | 0    | 1              | 0    |
| <i>FLT3 fusion</i> | 0.0%          | 3.7%  | 0.0%           | 0.0%  | 0      | 1    | 0              | 0    |
| <i>ABL1 fusion</i> | 0.0%          | 0.0%  | 0.0%           | 0.0%  | 0      | 0    | 0              | 0    |
| <i>CALR</i>        | 0.0%          | 0.0%  | 4.0%           | 0.0%  | 0      | 0    | 1              | 0    |
| <i>NTRK2</i>       | 0.0%          | 0.0%  | 0.0%           | 0.0%  | 0      | 0    | 0              | 0    |
| <i>STAT3</i>       | 0.0%          | 0.0%  | 0.0%           | 3.4%  | 0      | 0    | 0              | 1    |
| <i>STAT5A</i>      | 0.0%          | 0.0%  | 0.0%           | 3.4%  | 0      | 0    | 0              | 1    |
| <i>CCND2</i>       | 0.0%          | 0.0%  | 12.0%          | 0.0%  | 0      | 0    | 3              | 0    |
| <i>ETNK1</i>       | 2.6%          | 3.7%  | 4.0%           | 0.0%  | 1      | 1    | 1              | 0    |
| <i>ASXL1</i>       | 76.9%         | 81.5% | 64.0%          | 69.0% | 30     | 22   | 16             | 20   |
| <i>ASXL2</i>       | 2.6%          | 3.7%  | 8.0%           | 0.0%  | 1      | 1    | 2              | 0    |
| <i>SRSF2</i>       | 43.6%         | 37.0% | 48.0%          | 24.1% | 17     | 10   | 12             | 7    |
| <i>U2AF1</i>       | 15.4%         | 14.8% | 8.0%           | 24.1% | 6      | 4    | 2              | 7    |
| <i>SF3B1</i>       | 2.6%          | 0.0%  | 16.0%          | 0.0%  | 1      | 0    | 4              | 0    |
| <i>U2AF2</i>       | 5.1%          | 0.0%  | 0.0%           | 3.4%  | 2      | 0    | 0              | 1    |
| <i>ZRSR2</i>       | 2.6%          | 3.7%  | 0.0%           | 3.4%  | 1      | 1    | 0              | 1    |
| <i>PRPF8</i>       | 2.6%          | 0.0%  | 0.0%           | 10.3% | 1      | 0    | 0              | 3    |
| <i>TET2</i>        | 20.5%         | 37.0% | 44.0%          | 48.3% | 8      | 10   | 11             | 14   |
| <i>SETBP1</i>      | 41.0%         | 7.4%  | 16.0%          | 13.8% | 16     | 2    | 4              | 4    |
| <i>EZH2</i>        | 20.5%         | 29.6% | 24.0%          | 6.9%  | 8      | 8    | 6              | 2    |
| <i>GATA2</i>       | 12.8%         | 14.8% | 16.0%          | 13.8% | 5      | 4    | 4              | 4    |
| <i>RUNX1</i>       | 2.6%          | 11.1% | 4.0%           | 27.6% | 1      | 3    | 1              | 8    |
| <i>DNMT3A</i>      | 5.1%          | 7.4%  | 0.0%           | 10.3% | 2      | 2    | 0              | 3    |
| <i>STAG2</i>       | 2.6%          | 14.8% | 8.0%           | 3.4%  | 1      | 4    | 2              | 1    |
| <i>SMC1A</i>       | 5.1%          | 0.0%  | 0.0%           | 3.4%  | 2      | 0    | 0              | 1    |
| <i>RAD21</i>       | 0.0%          | 0.0%  | 4.0%           | 0.0%  | 0      | 0    | 1              | 0    |
| <i>PDS5B</i>       | 0.0%          | 3.7%  | 0.0%           | 0.0%  | 0      | 1    | 0              | 0    |
| <i>CUX1</i>        | 5.1%          | 11.1% | 0.0%           | 0.0%  | 2      | 3    | 0              | 0    |
| <i>PPM1D</i>       | 2.6%          | 3.7%  | 0.0%           | 0.0%  | 1      | 1    | 0              | 0    |
| <i>TP53</i>        | 2.6%          | 0.0%  | 0.0%           | 0.0%  | 1      | 0    | 0              | 0    |
| <i>BRCC3</i>       | 2.6%          | 0.0%  | 4.0%           | 0.0%  | 1      | 0    | 1              | 0    |
| <i>NPM1</i>        | 0.0%          | 3.7%  | 0.0%           | 3.4%  | 0      | 1    | 0              | 1    |
| <i>CEBPA</i>       | 0.0%          | 0.0%  | 8.0%           | 0.0%  | 0      | 0    | 2              | 0    |
| <i>IDH2</i>        | 2.6%          | 0.0%  | 0.0%           | 0.0%  | 1      | 0    | 0              | 0    |
| <i>NFE2</i>        | 0.0%          | 0.0%  | 0.0%           | 0.0%  | 0      | 0    | 0              | 0    |
| <i>WT1</i>         | 5.1%          | 0.0%  | 0.0%           | 0.0%  | 2      | 0    | 0              | 0    |
| <i>PHF6</i>        | 2.6%          | 3.7%  | 0.0%           | 6.9%  | 1      | 1    | 0              | 2    |
| <i>BCOR</i>        | 0.0%          | 3.7%  | 4.0%           | 3.4%  | 0      | 1    | 1              | 1    |
| <i>BCORL1</i>      | 0.0%          | 0.0%  | 0.0%           | 3.4%  | 0      | 0    | 0              | 1    |
| Total number       |               |       |                |       | 39     | 27   | 25             | 29   |

\*represents statistical significance. Statistical analysis was performed using contingency table Chi-Square and Bonferroni multiple comparison correction.

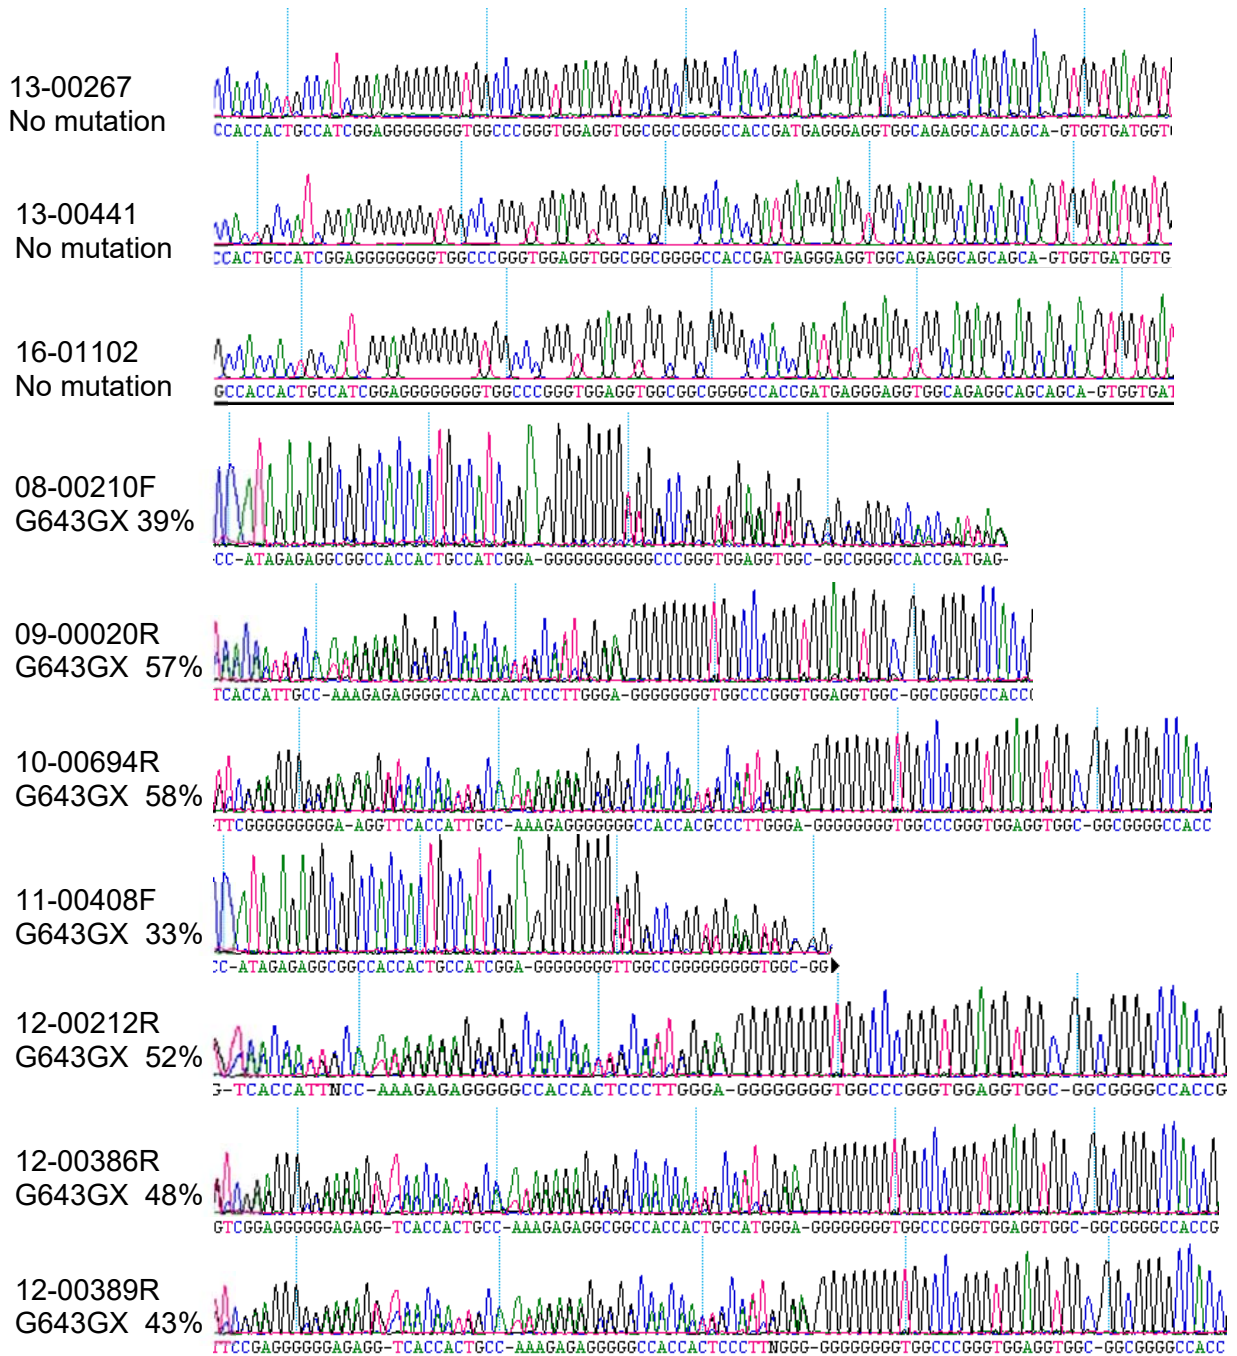

**Supplementary Figure 1. Sanger validation of ASXL1 G643GX mutation.** The graph depicts the Sanger sequencing validation of ASXL1 G643GX mutations detected by exome sequencing (bottom seven samples). The top three samples are control samples (no ASXL1 mutations detected by exome sequencing). Variant allelic frequencies detected by exome sequencing were shown.

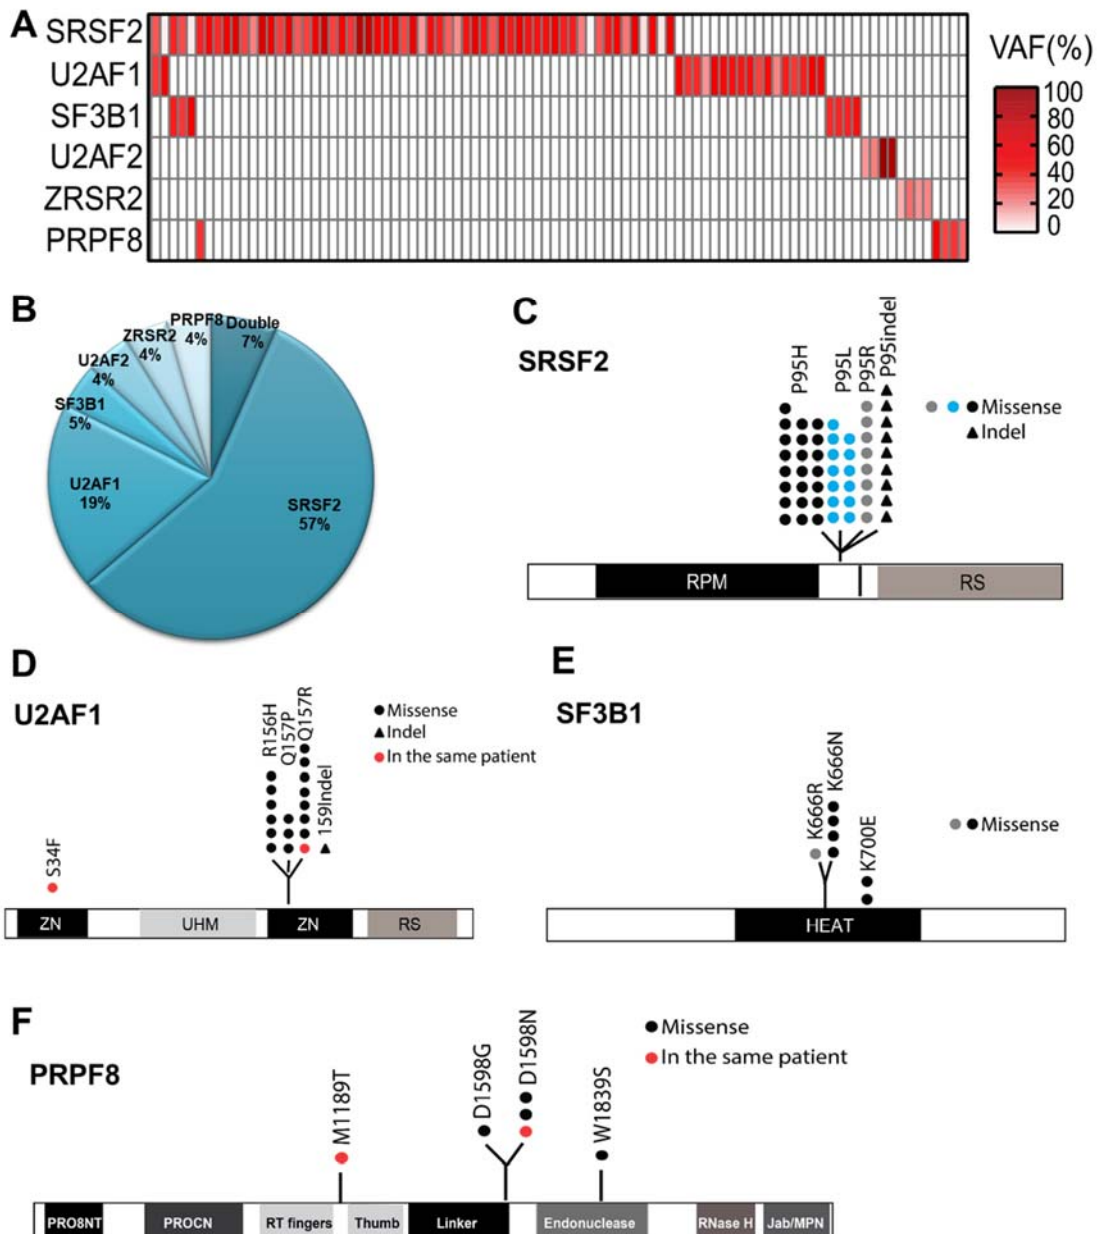

**Supplementary Figure 2. Distribution of mutations on splicing factors.**

(A) The mosaic plot depicts the spectrum of different splicing factor in the cohorts. (B) The pie chart depicts the frequencies of different splicing factor mutations. The graph depicts the structure and distributions of mutations on *SRSF2* (C), *U2AF1* (D), *SF3B1* (E), and *PRPF8* (F).

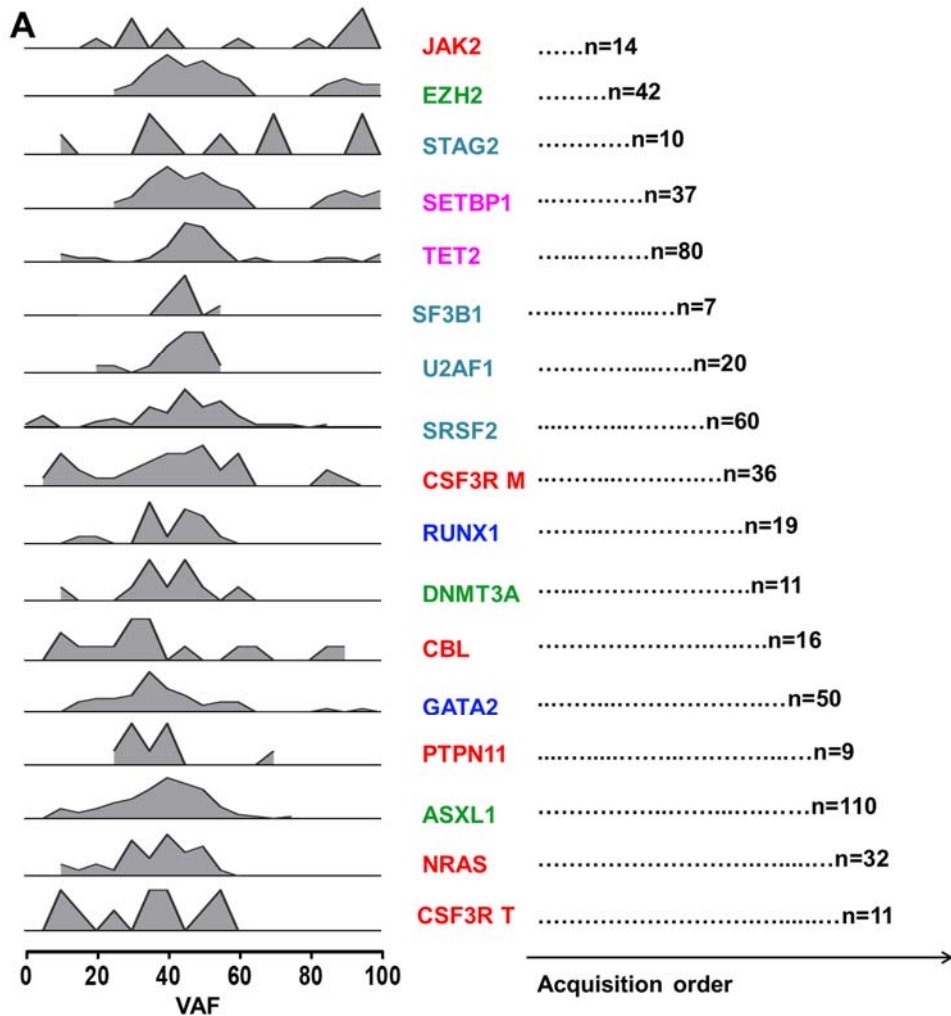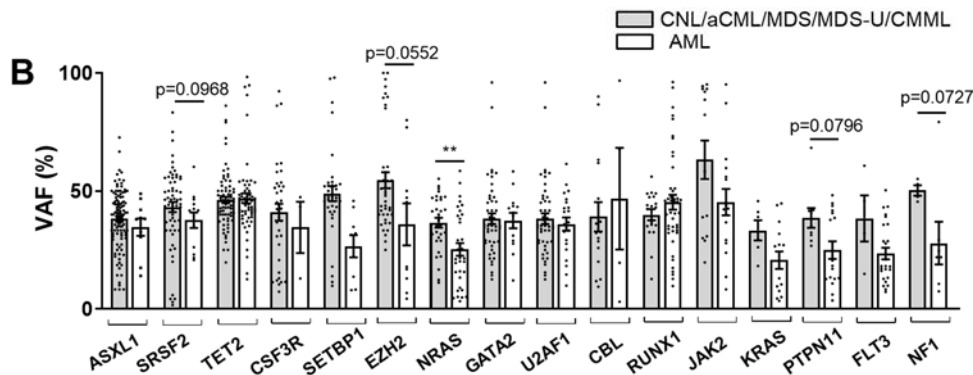

**Supplementary Figure 3. Clonal architecture of different pathway mutations.** (A) The histogram illustrates VAF and the number of patients with a particular gene mutation. Gene mutations with higher VAFs are considered to occur earlier than variants with lower VAFs. (B) The graph depicts Mean  $\pm$  SEM of VAFs of common driver mutations in CNL/aCML/unclassifiable/CMML from the current study and AML patients from the BeatAML study. Statistical analysis was performed using two-tailed Mann-Whitney tests and expressed as \*\*  $p < .01$ .



**Supplementary Table 3. The frequency of gene mutations in different signaling molecular groups**

|                | <b>RAS</b> | <b>CSF3R</b> | <b>JAK2</b> | <b>RAS</b> | <b>CSF3R</b> | <b>JAK2</b> |
|----------------|------------|--------------|-------------|------------|--------------|-------------|
|                | Frequency  |              |             | number     |              |             |
| CNL            | 12.5%      | 77.8%        | 25.0%       | 6          | 21           | 3           |
| aCML           | 14.6%      | 11.1%        | 25.0%       | 7          | 3            | 3           |
| Unclassifiable | 14.6%      | 3.7%         | 16.7%       | 7          | 1            | 2           |
| CMMML          | 39.6%      | 3.7%         | 8.3%        | 19         | 1            | 1           |
| ASXL1          | 72.9%      | 85.2%        | 50.0%       | 35         | 23           | 6           |
| ASXL2          | 4.2%       | 3.7%         | 0.0%        | 2          | 1            | 0           |
| SRSF2          | 45.8%      | 40.7%        | 16.7%       | 22         | 11           | 2           |
| U2AF1          | 12.5%      | 18.5%        | 0.0%        | 6          | 5            | 0           |
| SF3B1          | 0.0%       | 3.7%         | 8.3%        | 0          | 1            | 1           |
| U2AF2          | 0.0%       | 11.1%        | 0.0%        | 0          | 3            | 0           |
| ZRSR2          | 0.0%       | 7.4%         | 16.7%       | 0          | 2            | 2           |
| TET2           | 41.7%      | 22.2%        | 50.0%       | 20         | 6            | 6           |
| SETBP1         | 20.8%      | 40.7%        | 0.0%        | 10         | 11           | 0           |
| EZH2           | 18.8%      | 14.8%        | 33.3%       | 9          | 4            | 4           |
| GATA2          | 20.8%      | 11.1%        | 0.0%        | 10         | 3            | 0           |
| RUNX1          | 18.8%      | 7.4%         | 8.3%        | 9          | 2            | 1           |
| DNMT3A         | 8.3%       | 7.4%         | 8.3%        | 4          | 2            | 1           |
| STAG2          | 12.5%      | 3.7%         | 0.0%        | 6          | 1            | 0           |
| PPM1D          | 0.0%       | 0.0%         | 16.7%       | 0          | 0            | 2           |
| WT1            | 0.0%       | 7.4%         | 0.0%        | 0          | 2            | 0           |
| NPM1           | 4.2%       | 0.0%         | 0.0%        | 2          | 0            | 0           |
| SMC1A          | 0.0%       | 0.0%         | 0.0%        | 0          | 0            | 0           |
| PRPF8          | 2.1%       | 3.7%         | 0.0%        | 1          | 1            | 0           |
| PDS5B          | 0.0%       | 0.0%         | 0.0%        | 0          | 0            | 0           |
| RAD21          | 0.0%       | 0.0%         | 8.3%        | 0          | 0            | 1           |
| CUX1           | 2.1%       | 3.7%         | 8.3%        | 1          | 1            | 1           |
| TP53           | 2.1%       | 0.0%         | 0.0%        | 1          | 0            | 0           |
| BRCC3          | 0.0%       | 3.7%         | 0.0%        | 0          | 1            | 0           |
| CEBPA          | 0.0%       | 0.0%         | 0.0%        | 0          | 0            | 0           |
| IDH2           | 0.0%       | 0.0%         | 0.0%        | 0          | 0            | 0           |
| NFE2           | 0.0%       | 0.0%         | 0.0%        | 0          | 0            | 0           |
| PHF6           | 4.2%       | 0.0%         | 8.3%        | 2          | 0            | 1           |
| BCOR           | 4.2%       | 0.0%         | 8.3%        | 2          | 0            | 1           |
| BCORL1         | 0.0%       | 0.0%         | 8.3%        | 0          | 0            | 1           |
| Total number   |            |              |             | 48         | 27           | 12          |

**Supplementary Table 4. Coexisting different signaling pathway mutations in  
CNL/aCML/unclassifiable/CMML**

|    | ID       | Signaling<br>gene_1 | Signaling<br>gene_2 | Signaling<br>gene_3 | Other<br>gene_1 | Other<br>gene_2 | Other<br>gene_3 | Other<br>gene_4 | Other<br>gene_5 | Other<br>gene_6 |
|----|----------|---------------------|---------------------|---------------------|-----------------|-----------------|-----------------|-----------------|-----------------|-----------------|
| 1  | 13-00256 | <i>NF1</i>          | <i>JAK2</i>         | <i>SH2B3*</i>       | <i>TET2</i>     | <i>BCOR</i>     |                 |                 |                 |                 |
| 2  | 13-00187 | <i>CSF3R</i>        | <i>NRAS</i>         | <i>NTRK2</i>        | <i>ASXL1</i>    | <i>SETBP1</i>   |                 |                 |                 |                 |
| 3  | 15-00467 | <i>CSF3R*</i>       | <i>ABL1</i>         |                     | <i>ASXL1</i>    | <i>DNMT3A</i>   | <i>ASXL2</i>    |                 |                 |                 |
| 4  | 14-00201 | <i>CSF3R*</i>       | <i>CALR</i>         |                     | <i>ASXL1</i>    | <i>SRSF2</i>    | <i>TET2</i>     | <i>WT1</i>      |                 |                 |
| 5  | 14-00804 | <i>CSF3R</i>        | <i>CBL</i>          |                     | <i>ASXL1</i>    | <i>U2AF1</i>    | <i>DNMT3A</i>   |                 |                 |                 |
| 6  | 13-00514 | <i>CSF3R</i>        | <i>CBL</i>          |                     | <i>ASXL1</i>    |                 |                 |                 |                 |                 |
| 7  | 08-00423 | <i>CSF3R*</i>       | <i>CBL</i>          |                     | <i>ASXL1</i>    | <i>U2AF1</i>    |                 |                 |                 |                 |
| 8  | 13-00037 | <i>CSF3R</i>        | <i>NRAS</i>         |                     | <i>ASXL1</i>    | <i>SRSF2</i>    | <i>EZH2</i>     | <i>TET2</i>     |                 |                 |
| 9  | 12-00364 | <i>CSF3R</i>        | <i>NRAS</i>         |                     | <i>ASXL1</i>    | <i>EZH2</i>     | <i>SETBP1</i>   | <i>TET2</i>     |                 |                 |
| 10 | 13-00369 | <i>CSF3R_T</i>      | <i>NRAS</i>         |                     | <i>ASXL1</i>    | <i>SRSF2</i>    | <i>SETBP1</i>   |                 |                 |                 |
| 11 | 13-00438 | <i>CSF3R</i>        | <i>PTPN11</i>       |                     | <i>ASXL1</i>    | <i>SETBP1</i>   | <i>EZH2</i>     |                 |                 |                 |
| 12 | 12-00212 | <i>CSF3R</i>        | <i>PTPN11</i>       |                     | <i>ASXL1</i>    | <i>SETBP1</i>   | <i>EZH2*</i>    |                 |                 |                 |
| 13 | 14-00389 | <i>CSF3R</i>        | <i>PTPN11</i>       |                     | <i>ASXL1</i>    | <i>SRSF2</i>    | <i>SETBP1</i>   | <i>TET2</i>     |                 |                 |
| 14 | 15-00270 | <i>NRAS</i>         | <i>ABL1</i>         |                     | <i>ASXL1</i>    | <i>U2AF1</i>    | <i>GATA2</i>    |                 |                 |                 |
| 15 | 14-00413 | <i>NRAS</i>         | <i>CBL</i>          |                     | <i>ASXL1</i>    | <i>SRSF2</i>    | <i>SETBP1</i>   | <i>TET2</i>     |                 |                 |
| 16 | 14-00131 | <i>NRAS</i>         | <i>CBL</i>          |                     | <i>ASXL1</i>    | <i>TET2*</i>    | <i>EZH2*</i>    | <i>STAG2</i>    |                 |                 |
| 17 | 14-00685 | <i>NRAS</i>         | <i>FLT3</i>         |                     | <i>NPM1</i>     | <i>DNMT3A</i>   |                 |                 |                 |                 |
| 18 | 12-00388 | <i>NRAS</i>         | <i>GNB1</i>         |                     | <i>ASXL2*</i>   | <i>SRSF2</i>    |                 |                 |                 |                 |
| 19 | 13-00359 | <i>NRAS</i>         | <i>KRAS</i>         |                     | <i>ASXL1</i>    | <i>EZH2*</i>    | <i>TET2</i>     | <i>RUNX1</i>    |                 |                 |
| 20 | 12-00370 | <i>NRAS</i>         | <i>KRAS</i>         |                     | <i>ASXL1</i>    | <i>SRSF2</i>    | <i>TET2</i>     |                 |                 |                 |
| 21 | 13-00023 | <i>NRAS</i>         | <i>STAT3</i>        |                     | <i>ASXL1</i>    | <i>TET2</i>     |                 |                 |                 |                 |
| 22 | 09-00020 | <i>NRAS</i>         | <i>STAT5A</i>       |                     | <i>ASXL1</i>    | <i>SRSF2</i>    | <i>U2AF1</i>    | <i>GATA2*</i>   | <i>RUNX1</i>    | <i>DNMT3A</i>   |
| 23 | 14-00516 | <i>KRAS</i>         | <i>JAK1</i>         |                     | <i>ASXL1</i>    | <i>U2AF1*</i>   | <i>GATA2*</i>   |                 |                 |                 |
| 24 | 13-00269 | <i>PTPN11</i>       | <i>NF1</i>          |                     | <i>ASXL1</i>    | <i>SRSF2</i>    | <i>SETBP1</i>   | <i>CUX1</i>     |                 |                 |

\* indicates the presence of more than one mutation. *CSF3R\_T*: *CSF3R* truncation mutation.

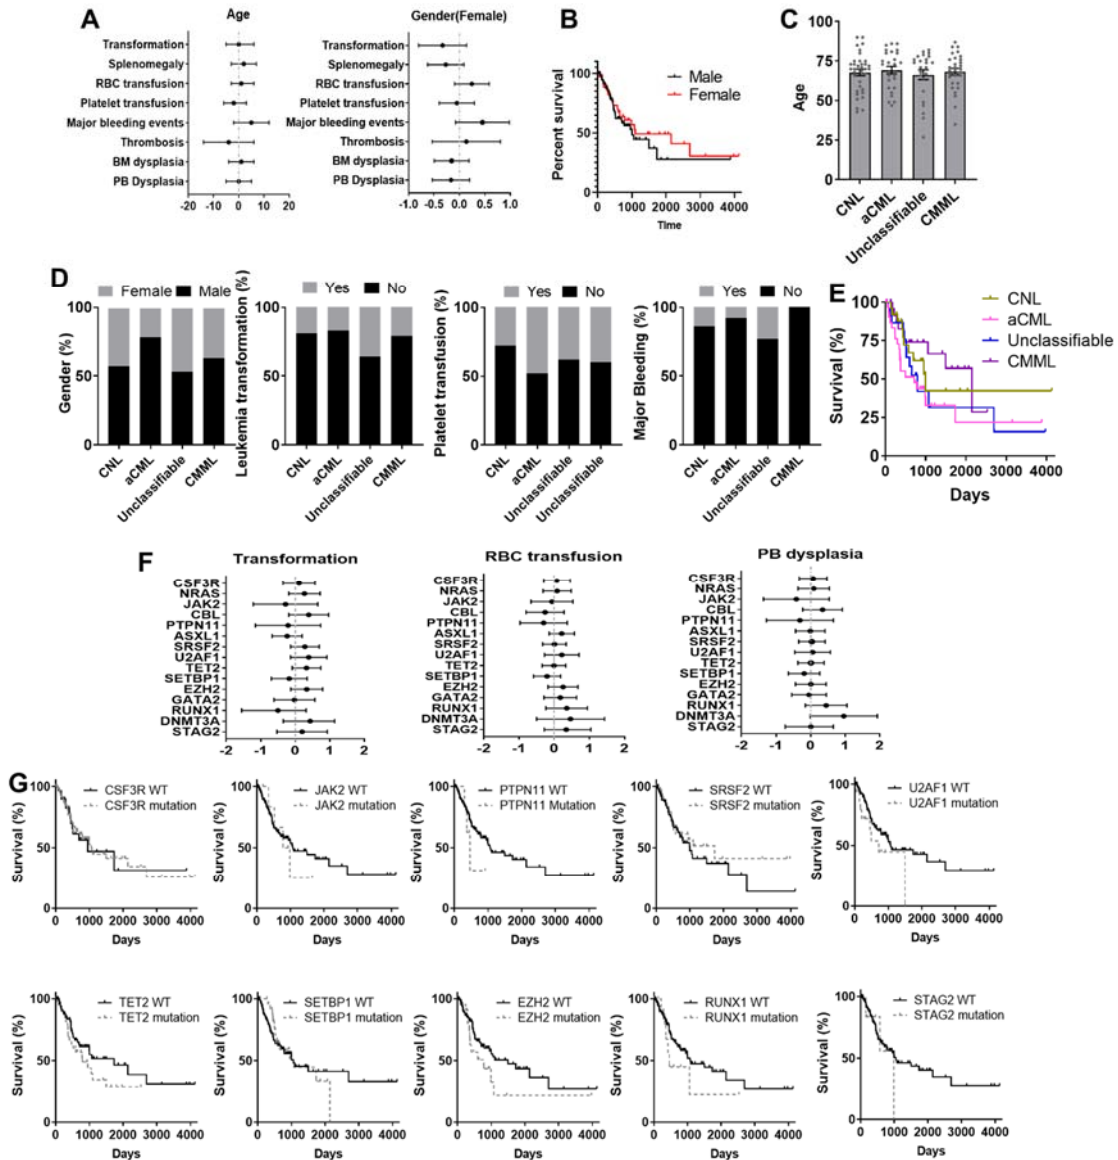

**Supplementary Figure 4. The association between clinical parameters and clinical outcomes.** (A) Graphs depict 95% CI and Hodges-Lehmann median difference of odds ratios of age and gender for different clinical outcomes calculated by Fisher's exact tests. (B) The graph depicts the Kaplan-Meier survival curve of patients with male or female gender. Statistical significance was analyzed by the log-rank test. (C) Graphs depict the mean  $\pm$  SEM of age in different disease subgroups. Statistical significance was assessed using one-way ANOVA and Kruskal-Wallis tests. (D) Graphs depict the comparison of frequencies of indicated clinical outcomes in different disease groups. Statistical significance was analyzed using a contingency table chi-square test. (E) The graph depicts the Kaplan-Meier survival curve of patients in different diagnosis subgroups. Statistical significance was analyzed by a log-rank test. (F) The graph depicts 95% CI and the median difference of the log-transformed odds ratios for different clinical parameters in the presence or absence of mutations in a given gene calculated by Fisher's exact tests. (G) Graphs depict the Kaplan-Meier survival curve of patients in the presence or absence of given gene mutations. Statistical significance was analyzed by log-rank tests.

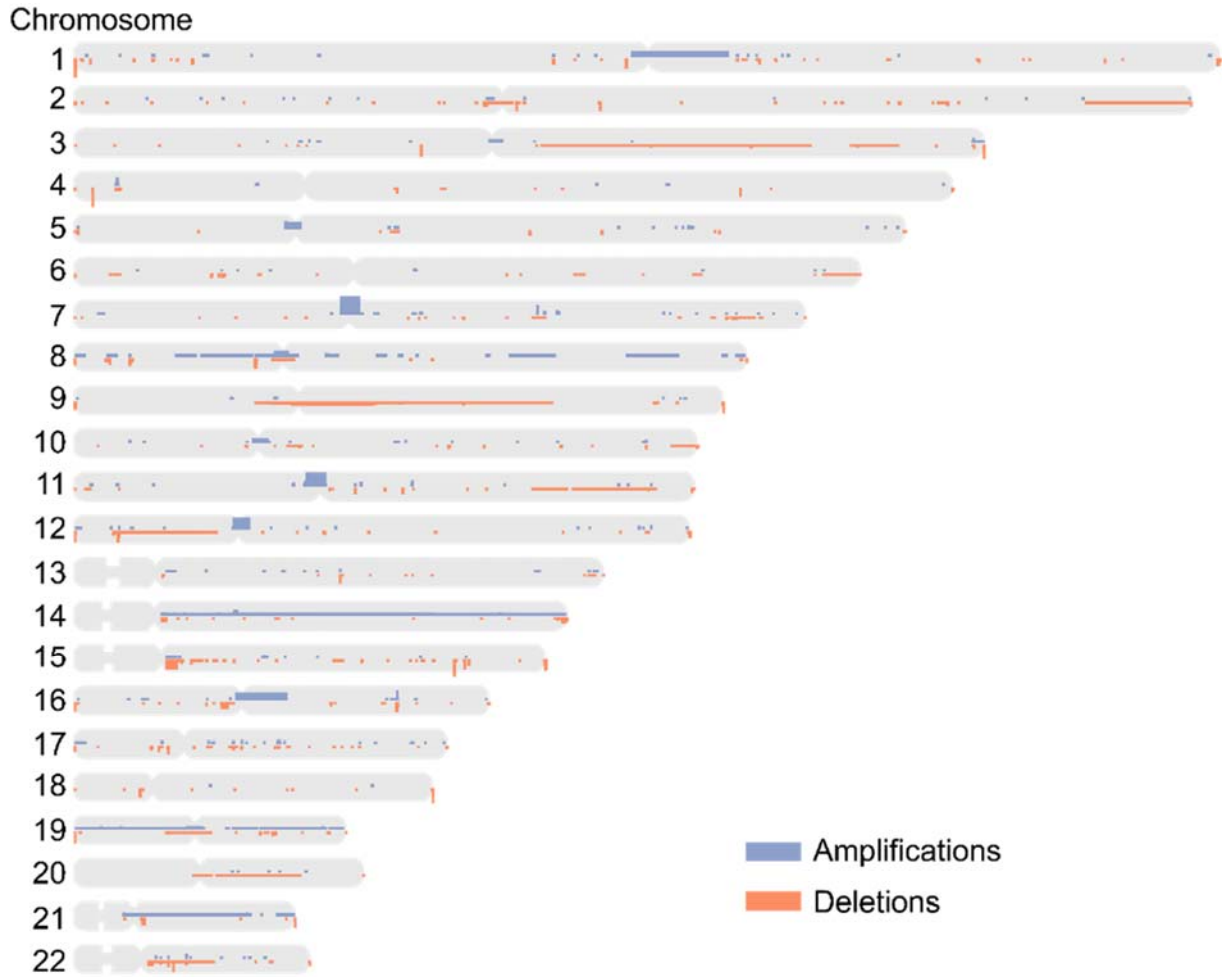

**Supplementary Figure 5. CNV analysis.** The plot displays CNV regions determined by  $\log_2$  (tumor read count/pooled normal count) on human chromosome 1-22, keeping only those with an absolute value  $>0.5$ . The height of the colored bar corresponds to the count of samples with a CNV in that region, with a maximum of 32. Segments in orange represent deletions, whereas purple segments indicate duplications. Grey regions represent normal regions, where there was not enough evidence to call a copy number variant. For more detailed information, please visit our online interactive user interface, Vizome, at [[www.vizome.org](http://www.vizome.org)].

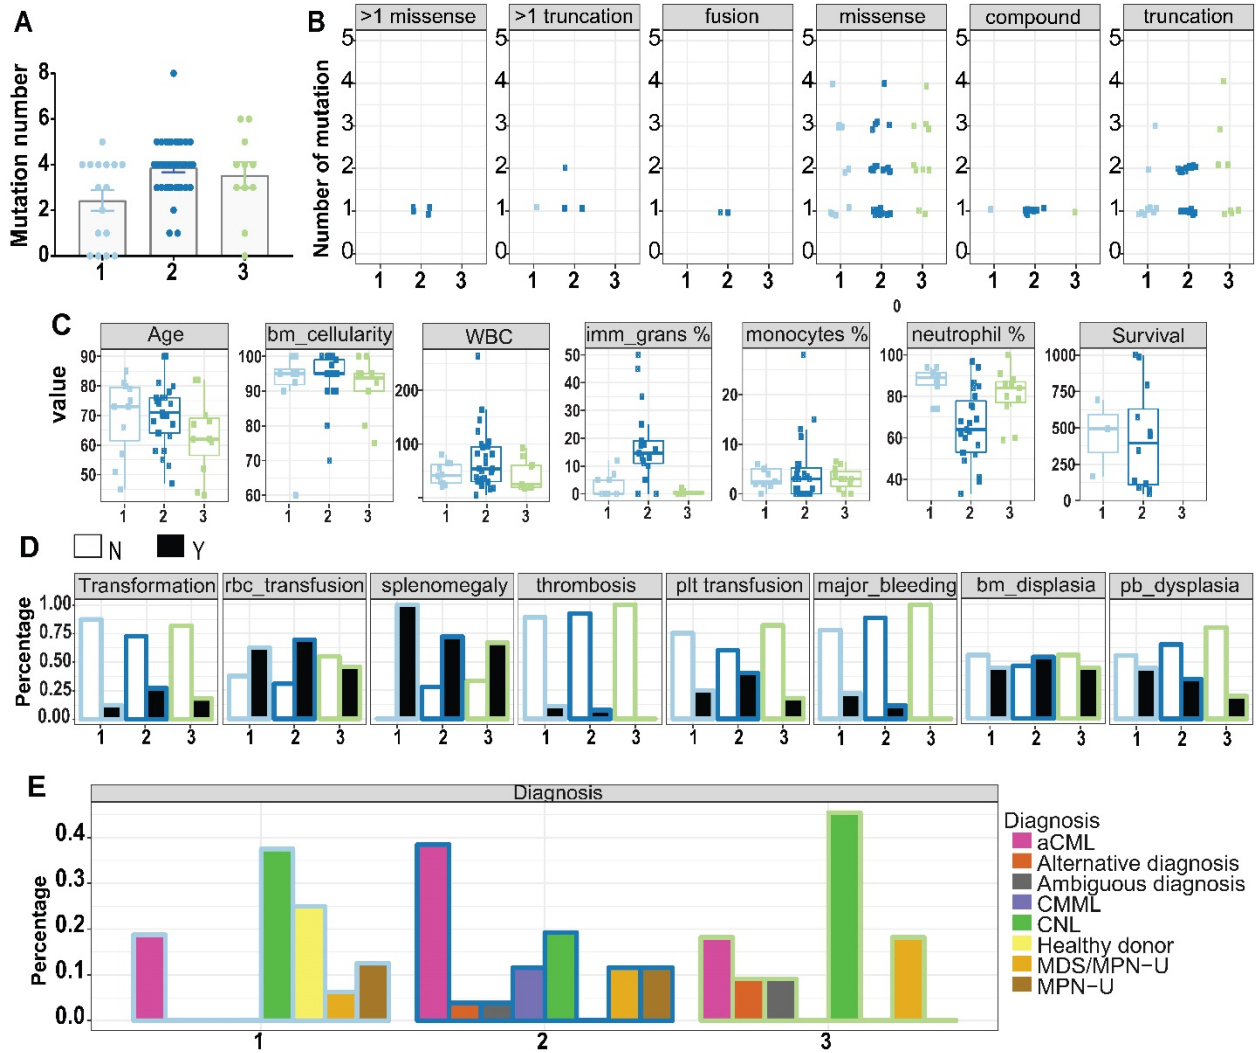

**Supplementary Figure 6. Differential clinical parameters in different consensus clusters.** (A) The graph plotted the number of mutated genes in each of the cluster. (B) Frequency of mutation classes by the cluster. For each mutation class, the number of genes in that class per sample (Y-axis) is shown relative to the cluster membership of the sample (X-axis and color). (C) Boxplots of the distribution of the numeric clinical data relative to the Consensus Clustering (k=7) clusters. Each data point indicates the value of the indicated clinical variable per sample. (D) The proportion of whether or not a given categorical clinical value (separated by subplots) was considered yes (Y) or no (N) in the 3 largest Consensus Cluster groups. (E) The proportion of the curated diagnosis categories with respect to the 3 largest clusters. The bars are filled with the diagnosis colors with the outlines indicating the cluster colors.

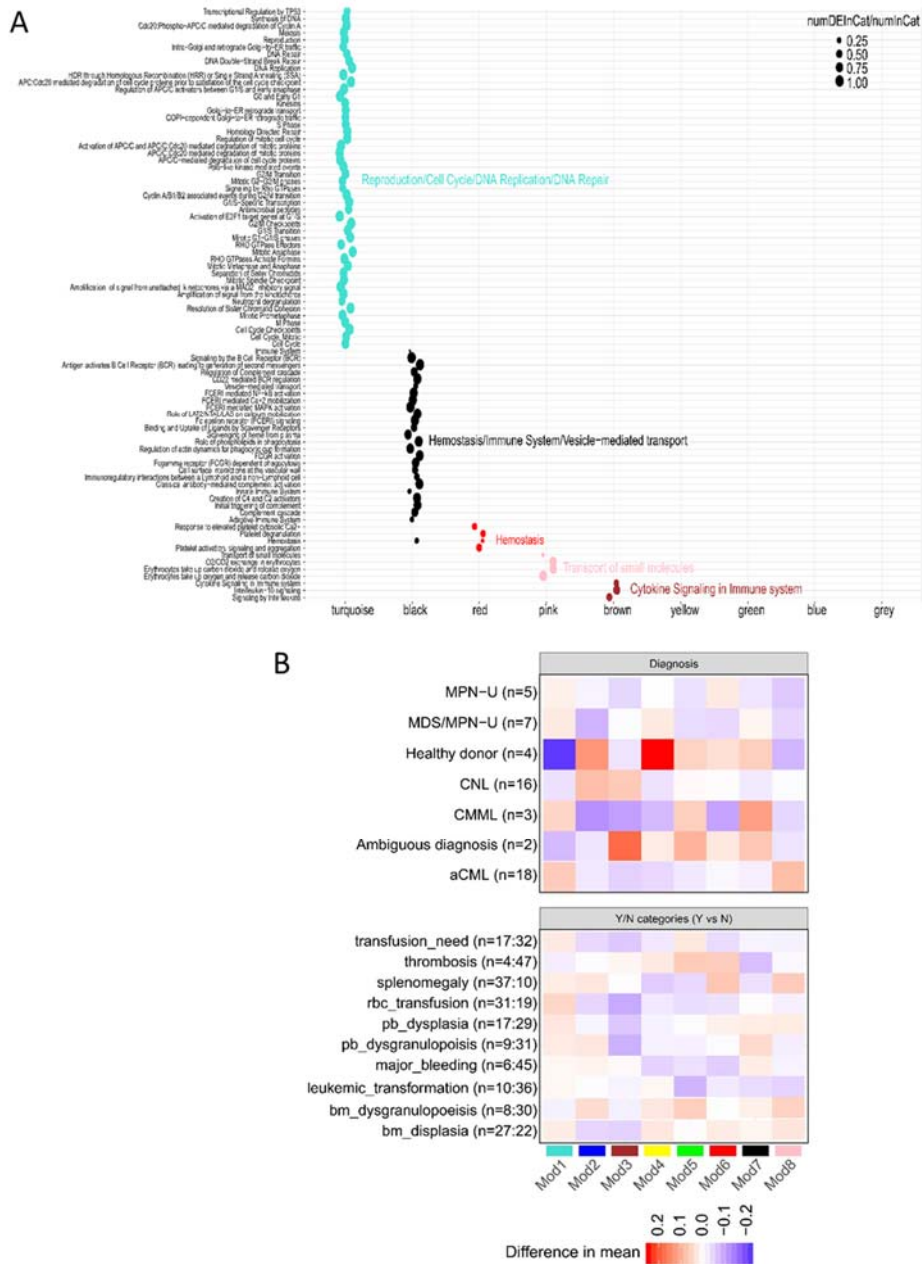

**Supplementary Figure 7. Reactome pathway and WGCNA gene expression and clinic parameter analysis.** (A) Reactome pathway analysis for the WGCNA modules. Significant Reactome pathways for the WGCNA modules at a Benjamini-Hochberg (BH) FDR < .05. The size of the points indicates the proportion of pathway genes that are also in a given module. The text to the right of each module indicates the highest level Reactome pathway(s) significantly enriched in the module. (B) Heatmap summary of the eigengene differences between the clinical categorical variables. The categories are grouped by either 'diagnosis' or 'Y/N' categories. The diagnosis categories indicate the difference between the average of the eigengenes of the given category for each module vs the average of the remaining categories. The sample size is indicated in parentheses. The 'Y/N' categories indicate the average difference between the 'Y' groups vs the 'N' group in terms of the module eigengenes. The sample size is shown as (Y: N). The x-axis indicates module name and color.

## Supplementary References

1. Li H. Aligning sequence reads , clone sequences and assembly contigs with BWA-MEM. 2013;
2. McKenna A, Hanna M, Banks E, et al. The Genome Analysis Toolkit: A MapReduce framework for analyzing next-generation DNA sequencing data. *Genome Res.* 2010;20(9):1297–1303.
3. Ye K, Schulz MH, Long Q, Apweiler R, Ning Z. Pindel: a pattern growth approach to detect break points of large deletions and medium sized insertions from paired-end short reads. *Bioinformatics.* 2009;25(21):2865–2871.
4. Zhang H, Savage S, Schultz AR, et al. Clinical resistance to crenolanib in acute myeloid leukemia due to diverse molecular mechanisms. *Nat. Commun.* 2019;10(1):244.
5. Jaiswal S, Fontanillas P, Flannick J, et al. Age-Related Clonal Hematopoiesis Associated with Adverse Outcomes. *N. Engl. J. Med.* 2014;371(26):2488–2498.
6. Ley TJ, Miller C, Ding L, et al. Genomic and epigenomic landscapes of adult de novo acute myeloid leukemia. *N. Engl. J. Med.* 2013;368(22):2059–74.
7. Tyner JW, Tognon CE, Bottomly D, et al. Functional genomic landscape of acute myeloid leukaemia. *Nature.* 2018;562(7728):526–531.
8. Zhang H, Reister Schultz A, Luty S, et al. Characterization of the leukemogenic potential of distal cytoplasmic CSF3R truncation and missense mutations. *Leukemia.* 2017;
9. Liao Y, Smyth GK, Shi W. The Subread aligner: Fast, accurate and scalable read mapping by seed-and-vote. *Nucleic Acids Res.* 2013;41(10):.
10. Talevich E, Shain AH, Botton T, Bastian BC. CNVkit: Genome-Wide Copy Number Detection and Visualization from Targeted DNA Sequencing. *PLOS Comput. Biol.* 2016;12(4):e1004873.
11. Venkatraman ES, Olshen AB. A faster circular binary segmentation algorithm for the analysis of array CGH data. *Bioinformatics.* 2007;23(6):657–663.
12. Haas B, Dobin A, Stransky N, et al. STAR-Fusion: Fast and Accurate Fusion Transcript Detection from RNA-Seq. *bioRxiv.* 2017;120295.
13. Kim D, Salzberg SL. TopHat-Fusion: An algorithm for discovery of novel fusion transcripts. *Genome Biol.* 2011;12(8):.
14. Zhang H, Paliga A, Hobbs E, et al. Two myeloid leukemia cases with rare FLT3 fusions. *Cold Spring Harb. Mol. case Stud.* 2018;4(6):.
15. Monti S, Tamayo P, Mesirov J, Golub T. Consensus clustering: A resampling-based method for class discovery and visualization of gene expression microarray data. *Mach. Learn.* 2003;52(1–2):91–118.
16. Law CW, Chen Y, Shi W, Smyth GK. Voom: Precision weights unlock linear model analysis tools for RNA-seq read counts. *Genome Biol.* 2014;15(2):.
17. Young MD, Wakefield MJ, Smyth GK, Oshlack A. Gene ontology analysis for RNA-seq: accounting for selection bias. *Genome Biol.* 2010;11(2):.
18. Fabregat A, Sidiropoulos K, Viteri G, et al. Reactome pathway analysis: A high-performance in-memory approach. *BMC Bioinformatics.* 2017;18(1):.
